# Supplementary material
Source: publisher figshare collection journal article supplement (https://acs.figshare.com/ndownloader/files/3823639)
Supplement: Supplementary file 1 [file 3823639]

data_0926
_audit_creation_date              2015-02-10
_audit_creation_method
;
Olex2 1.2
(compiled 2015.01.26 svn.r3150 for OlexSys, GUI svn.r4998)
;
_publ_contact_author_address      ?
_publ_contact_author_email        ?
_publ_contact_author_name         ''
_publ_contact_author_phone        ?
_publ_section_references
;
Dolomanov, O.V., Bourhis, L.J., Gildea, R.J, Howard, J.A.K. & Puschmann, H.
 (2009), J. Appl. Cryst. 42, 339-341.

Sheldrick, G.M. (2008). Acta Cryst. A64, 112-122.
;
_chemical_name_common             ?
_chemical_name_systematic         ?
_chemical_formula_moiety          'C16 H14 O2'
_chemical_formula_sum             'C16 H14 O2'
_chemical_formula_weight          238.27
_chemical_absolute_configuration  unk
_chemical_melting_point           ?
loop_
  _atom_type_symbol
  _atom_type_description
  _atom_type_scat_dispersion_real
  _atom_type_scat_dispersion_imag
  _atom_type_scat_source
 'C' 'C' 0.0181 0.0091 'International Tables Vol C Tables 4.2.6.8 and 6.1.1.4'
 'H' 'H' 0.0000 0.0000 'International Tables Vol C Tables 4.2.6.8 and 6.1.1.4'
 'O' 'O' 0.0492 0.0322 'International Tables Vol C Tables 4.2.6.8 and 6.1.1.4'

_shelx_space_group_comment
;
The symmetry employed for this shelxl refinement is uniquely defined
by the following loop, which should always be used as a source of
symmetry information in preference to the above space-group names.
They are only intended as comments.
;
_space_group_crystal_system       'orthorhombic'
_space_group_IT_number            19
_space_group_name_H-M_alt         'P 21 21 21'
_space_group_name_Hall            'P 2ac 2ab'
loop_
  _space_group_symop_operation_xyz
 'x, y, z'
 '-x+1/2, -y, z+1/2'
 'x+1/2, -y+1/2, -z'
 '-x, y+1/2, -z+1/2'

_cell_length_a                    8.4770(4)
_cell_length_b                    8.5847(5)
_cell_length_c                    17.5470(5)
_cell_angle_alpha                 90
_cell_angle_beta                  90
_cell_angle_gamma                 90
_cell_volume                      1276.95(10)
_cell_formula_units_Z             4
_cell_measurement_reflns_used     2003
_cell_measurement_temperature     294.39(10)
_cell_measurement_theta_max       68.4730
_cell_measurement_theta_min       5.0310
_shelx_estimated_absorpt_T_max    ?
_shelx_estimated_absorpt_T_min    ?
_exptl_absorpt_coefficient_mu     0.644
_exptl_absorpt_correction_T_max   1.00000
_exptl_absorpt_correction_T_min   0.77384
_exptl_absorpt_correction_type    multi-scan
_exptl_absorpt_process_details
;
CrysAlisPro, Agilent Technologies,
Version 1.171.36.32 (release 02-08-2013 CrysAlis171 .NET)
(compiled Aug  2 2013,16:46:58)
Empirical absorption correction using spherical harmonics,
 implemented in SCALE3 ABSPACK scaling algorithm.
;
_exptl_absorpt_special_details    ?
_exptl_crystal_colour             'clear light colourless'
_exptl_crystal_colour_lustre      clear
_exptl_crystal_colour_modifier    light
_exptl_crystal_colour_primary     colourless
_exptl_crystal_density_diffrn     1.239
_exptl_crystal_density_meas       ?
_exptl_crystal_density_method     ?
_exptl_crystal_description        block
_exptl_crystal_F_000              504
_exptl_crystal_size_max           0.21
_exptl_crystal_size_mid           0.16
_exptl_crystal_size_min           0.12
_exptl_transmission_factor_max    ?
_exptl_transmission_factor_min    ?
_diffrn_reflns_av_R_equivalents   0.0155
_diffrn_reflns_av_unetI/netI      0.0203
_diffrn_reflns_Laue_measured_fraction_full 0.919
_diffrn_reflns_Laue_measured_fraction_max 0.919
_diffrn_reflns_limit_h_max        9
_diffrn_reflns_limit_h_min        -6
_diffrn_reflns_limit_k_max        10
_diffrn_reflns_limit_k_min        -9
_diffrn_reflns_limit_l_max        20
_diffrn_reflns_limit_l_min        -20
_diffrn_reflns_number             4326
_diffrn_reflns_point_group_measured_fraction_full 0.864
_diffrn_reflns_point_group_measured_fraction_max 0.864
_diffrn_reflns_theta_full         65.815
_diffrn_reflns_theta_max          65.815
_diffrn_reflns_theta_min          5.041
_diffrn_ambient_temperature       294.39(10)
_diffrn_detector_area_resol_mean  16.0733
_diffrn_measured_fraction_theta_full 0.919
_diffrn_measured_fraction_theta_max 0.919
_diffrn_measurement_details
;
#__ type_ start__ end____ width___ exp.time_
  1 omega   40.00   65.00   1.0000    1.0000
omega____ theta____ kappa____ phi______ frames
    -        0.0000   57.0000  150.0000 25

#__ type_ start__ end____ width___ exp.time_
  2 omega   -4.00   34.00   1.0000    1.0000
omega____ theta____ kappa____ phi______ frames
    -        0.0000   57.0000  150.0000 38

#__ type_ start__ end____ width___ exp.time_
  3 omega  -24.00    1.00   1.0000    1.0000
omega____ theta____ kappa____ phi______ frames
    -        0.0000   87.0000  163.0000 25

#__ type_ start__ end____ width___ exp.time_
  4 omega   85.00  111.00   1.0000    1.0000
omega____ theta____ kappa____ phi______ frames
    -       54.0000 -125.0000    0.0000 26

#__ type_ start__ end____ width___ exp.time_
  5 omega   43.00   72.00   1.0000    1.0000
omega____ theta____ kappa____ phi______ frames
    -       54.0000   57.0000  -60.0000 29

#__ type_ start__ end____ width___ exp.time_
  6 omega   24.00   50.00   1.0000    1.0000
omega____ theta____ kappa____ phi______ frames
    -       54.0000 -125.0000    0.0000 26

#__ type_ start__ end____ width___ exp.time_
  7 omega  -11.00   71.00   1.0000    1.0000
omega____ theta____ kappa____ phi______ frames
    -       54.0000  -57.0000   90.0000 82

#__ type_ start__ end____ width___ exp.time_
  8 omega   32.00  123.00   1.0000    1.0000
omega____ theta____ kappa____ phi______ frames
    -       54.0000   57.0000   90.0000 91

#__ type_ start__ end____ width___ exp.time_
  9 omega   91.00  119.00   1.0000    1.0000
omega____ theta____ kappa____ phi______ frames
    -       54.0000   57.0000  -60.0000 28

#__ type_ start__ end____ width___ exp.time_
 10 omega   59.00  123.00   1.0000    1.0000
omega____ theta____ kappa____ phi______ frames
    -      108.0000  -63.0000  -30.0000 64

#__ type_ start__ end____ width___ exp.time_
 11 omega   35.00   90.00   1.0000    1.0000
omega____ theta____ kappa____ phi______ frames
    -      108.0000  -38.0000 -180.0000 55

#__ type_ start__ end____ width___ exp.time_
 12 omega   34.00   70.00   1.0000    1.0000
omega____ theta____ kappa____ phi______ frames
    -      108.0000  -25.0000    0.0000 36

#__ type_ start__ end____ width___ exp.time_
 13 omega   38.00   63.00   1.0000    1.0000
omega____ theta____ kappa____ phi______ frames
    -      108.0000  -50.0000 -120.0000 25

#__ type_ start__ end____ width___ exp.time_
 14 omega  104.00  163.00   1.0000    1.0000
omega____ theta____ kappa____ phi______ frames
    -      108.0000  111.0000  -30.0000 59

#__ type_ start__ end____ width___ exp.time_
 15 omega   89.00  174.00   1.0000    1.0000
omega____ theta____ kappa____ phi______ frames
    -      108.0000   63.0000  -90.0000 85

#__ type_ start__ end____ width___ exp.time_
 16 omega  139.00  177.00   1.0000    1.0000
omega____ theta____ kappa____ phi______ frames
    -      108.0000   12.0000   60.0000 38

#__ type_ start__ end____ width___ exp.time_
 17 omega   36.00   78.00   1.0000    1.0000
omega____ theta____ kappa____ phi______ frames
    -      108.0000   12.0000   60.0000 42

#__ type_ start__ end____ width___ exp.time_
 18 omega   87.00  152.00   1.0000    1.0000
omega____ theta____ kappa____ phi______ frames
    -      108.0000   38.0000   30.0000 65
;
_diffrn_measurement_device_type   'SuperNova, Dual, Cu at zero, Eos'
_diffrn_measurement_method        '\w scans'
_diffrn_orient_matrix_UB_11       -0.0754808000
_diffrn_orient_matrix_UB_12       -0.1578610000
_diffrn_orient_matrix_UB_13       0.0205326000
_diffrn_orient_matrix_UB_21       0.0586488000
_diffrn_orient_matrix_UB_22       -0.0685776000
_diffrn_orient_matrix_UB_23       -0.0760122000
_diffrn_orient_matrix_UB_31       0.1545845000
_diffrn_orient_matrix_UB_32       -0.0508288000
_diffrn_orient_matrix_UB_33       0.0388148000
_diffrn_radiation_monochromator   mirror
_diffrn_radiation_type            CuK\a
_diffrn_radiation_wavelength      1.54184
_diffrn_source                    'SuperNova (Cu) X-ray Source'
_reflns_Friedel_coverage          0.598
_reflns_Friedel_fraction_full     0.785
_reflns_Friedel_fraction_max      0.785
_reflns_number_gt                 1769
_reflns_number_total              1910
_reflns_odcompleteness_completeness 91.48
_reflns_odcompleteness_iscentric  1
_reflns_odcompleteness_theta      66.97
_reflns_special_details
;
 Reflections were merged by SHELXL according to the crystal
 class for the calculation of statistics and refinement.
 
 _reflns_Friedel_fraction is defined as the number of unique
 Friedel pairs measured divided by the number that would be
 possible theoretically, ignoring centric projections and
 systematic absences.
;
_reflns_threshold_expression      'I > 2\s(I)'
_computing_cell_refinement
;
CrysAlisPro, Agilent Technologies,
Version 1.171.36.32 (release 02-08-2013 CrysAlis171 .NET)
(compiled Aug  2 2013,16:46:58)
;
_computing_data_collection
;
CrysAlisPro, Agilent Technologies,
Version 1.171.36.32 (release 02-08-2013 CrysAlis171 .NET)
(compiled Aug  2 2013,16:46:58)
;
_computing_data_reduction
;
CrysAlisPro, Agilent Technologies,
Version 1.171.36.32 (release 02-08-2013 CrysAlis171 .NET)
(compiled Aug  2 2013,16:46:58)
;
_computing_molecular_graphics     'Olex2 (Dolomanov et al., 2009)'
_computing_publication_material   'Olex2 (Dolomanov et al., 2009)'
_computing_structure_refinement   'ShelXL (Sheldrick, 2008)'
_computing_structure_solution     'ShelXS (Sheldrick, 2008)'
_refine_diff_density_max          0.095
_refine_diff_density_min          -0.101
_refine_diff_density_rms          0.025
_refine_ls_abs_structure_details
;
 Flack x determined using 598 quotients [(I+)-(I-)]/[(I+)+(I-)]
 (Parsons, Flack and Wagner, Acta Cryst. B69 (2013) 249-259).
;
_refine_ls_abs_structure_Flack    0.06(10)
_refine_ls_extinction_coef        .
_refine_ls_extinction_method      none
_refine_ls_goodness_of_fit_ref    1.141
_refine_ls_hydrogen_treatment     mixed
_refine_ls_matrix_type            full
_refine_ls_number_parameters      171
_refine_ls_number_reflns          1910
_refine_ls_number_restraints      0
_refine_ls_R_factor_all           0.0469
_refine_ls_R_factor_gt            0.0440
_refine_ls_restrained_S_all       1.141
_refine_ls_shift/su_max           0.000
_refine_ls_shift/su_mean          0.000
_refine_ls_structure_factor_coef  Fsqd
_refine_ls_weighting_details
'w=1/[\s^2^(Fo^2^)+(0.0389P)^2^+0.1878P] where P=(Fo^2^+2Fc^2^)/3'
_refine_ls_weighting_scheme       calc
_refine_ls_wR_factor_gt           0.1064
_refine_ls_wR_factor_ref          0.1086
_refine_special_details           ?
_olex2_refinement_description
;
1. Fixed Uiso
 At 1.2 times of:
  All C(H) groups, All C(H,H) groups
2.a Ternary CH refined with riding coordinates:
 C9(H9)
2.b Secondary CH2 refined with riding coordinates:
 C1(H1A,H1B)
2.c Aromatic/amide H refined with riding coordinates:
 C5(H5), C13(H13), C6(H6), C15(H15), C12(H12), C3(H3), C16(H16), C14(H14),
 C4(H4)
;
_atom_sites_solution_hydrogens    mixed
_atom_sites_solution_primary      direct
_atom_sites_solution_secondary    ?
loop_
  _atom_site_label
  _atom_site_type_symbol
  _atom_site_fract_x
  _atom_site_fract_y
  _atom_site_fract_z
  _atom_site_U_iso_or_equiv
  _atom_site_adp_type
  _atom_site_occupancy
  _atom_site_site_symmetry_order
  _atom_site_calc_flag
  _atom_site_refinement_flags_posn
  _atom_site_refinement_flags_adp
  _atom_site_refinement_flags_occupancy
  _atom_site_disorder_assembly
  _atom_site_disorder_group
 O1 O 0.1308(3) 0.4732(4) 0.72061(11) 0.0857(8) Uani 1 1 d . . . . .
 O2 O 0.1560(3) 0.6329(3) 0.61371(10) 0.0734(6) Uani 1 1 d . . . . .
 C1 C 0.1895(4) 0.3408(5) 0.68019(19) 0.0802(10) Uani 1 1 d . . . . .
 H1A H 0.2301 0.2660 0.7167 0.096 Uiso 1 1 calc R . . . .
 H1B H 0.2767 0.3735 0.6481 0.096 Uiso 1 1 calc R . . . .
 C5 C -0.1428(5) 0.1143(7) 0.5365(2) 0.0980(13) Uani 1 1 d . . . . .
 H5 H -0.2130 0.0646 0.5038 0.118 Uiso 1 1 calc R . . . .
 C7 C -0.0646(4) 0.3458(5) 0.60752(17) 0.0726(10) Uani 1 1 d . . . . .
 C2 C 0.0680(4) 0.2626(5) 0.63156(16) 0.0695(9) Uani 1 1 d . . . . .
 C13 C 0.4381(5) 0.8864(6) 0.7141(2) 0.0936(12) Uani 1 1 d . . . . .
 H13 H 0.4655 0.9187 0.7630 0.112 Uiso 1 1 calc R . . . .
 C6 C -0.1699(4) 0.2694(6) 0.5592(2) 0.0904(12) Uani 1 1 d . . . . .
 H6 H -0.2591 0.3215 0.5418 0.109 Uiso 1 1 calc R . . . .
 C9 C 0.0530(4) 0.5790(5) 0.67268(17) 0.0806(11) Uani 1 1 d . . . . .
 H9 H 0.0170 0.6682 0.7029 0.097 Uiso 1 1 calc R . . . .
 C15 C 0.4795(4) 0.8964(6) 0.5814(2) 0.0897(11) Uani 1 1 d . . . . .
 H15 H 0.5351 0.9345 0.5397 0.108 Uiso 1 1 calc R . . . .
 C12 C 0.3162(5) 0.7801(5) 0.70492(18) 0.0828(11) Uani 1 1 d . . . . .
 H12 H 0.2621 0.7412 0.7469 0.099 Uiso 1 1 calc R . . . .
 C8 C -0.0865(4) 0.5055(5) 0.63369(18) 0.0790(10) Uani 1 1 d . . . . .
 C3 C 0.0913(4) 0.1107(5) 0.6096(2) 0.0834(10) Uani 1 1 d . . . . .
 H3 H 0.1795 0.0570 0.6270 0.100 Uiso 1 1 calc R . . . .
 C16 C 0.3589(4) 0.7922(5) 0.57043(18) 0.0753(9) Uani 1 1 d . . . . .
 H16 H 0.3322 0.7612 0.5213 0.090 Uiso 1 1 calc R . . . .
 C10 C -0.2186(7) 0.5898(9) 0.6261(3) 0.1103(17) Uani 1 1 d . . . . .
 C14 C 0.5185(5) 0.9446(6) 0.6532(2) 0.0953(13) Uani 1 1 d . . . . .
 H14 H 0.5993 1.0164 0.6604 0.114 Uiso 1 1 calc R . . . .
 C11 C 0.2768(4) 0.7331(4) 0.63205(16) 0.0678(8) Uani 1 1 d . . . . .
 C4 C -0.0132(5) 0.0380(6) 0.5627(3) 0.0956(12) Uani 1 1 d . . . . .
 H4 H 0.0042 -0.0649 0.5484 0.115 Uiso 1 1 calc R . . . .
 H10A H -0.311(6) 0.530(7) 0.597(3) 0.128(18) Uiso 1 1 d . . . . .
 H10B H -0.208(5) 0.692(7) 0.644(2) 0.108(16) Uiso 1 1 d . . . . .

loop_
  _atom_site_aniso_label
  _atom_site_aniso_U_11
  _atom_site_aniso_U_22
  _atom_site_aniso_U_33
  _atom_site_aniso_U_23
  _atom_site_aniso_U_13
  _atom_site_aniso_U_12
 O1 0.0969(18) 0.109(2) 0.0509(10) 0.0135(12) -0.0040(11) 0.0026(16)
 O2 0.0927(16) 0.0740(14) 0.0536(10) -0.0003(10) 0.0036(10) -0.0018(13)
 C1 0.073(2) 0.094(3) 0.0736(18) 0.0205(18) -0.0107(17) 0.005(2)
 C5 0.086(3) 0.111(4) 0.097(3) 0.013(2) -0.011(2) -0.031(3)
 C7 0.0562(18) 0.101(3) 0.0611(16) 0.0248(17) 0.0035(14) 0.0015(17)
 C2 0.0587(18) 0.089(2) 0.0607(16) 0.0209(16) 0.0019(14) -0.0022(17)
 C13 0.094(3) 0.103(3) 0.084(2) -0.023(2) -0.026(2) 0.023(3)
 C6 0.065(2) 0.118(4) 0.089(2) 0.026(2) -0.0121(18) -0.006(2)
 C9 0.092(2) 0.094(3) 0.0555(16) 0.0007(17) 0.0121(17) 0.019(2)
 C15 0.072(2) 0.103(3) 0.094(3) -0.008(2) 0.0055(19) 0.004(2)
 C12 0.102(3) 0.086(3) 0.0608(16) -0.0058(16) -0.0054(18) 0.021(2)
 C8 0.071(2) 0.105(3) 0.0610(17) 0.0160(18) 0.0080(16) 0.021(2)
 C3 0.071(2) 0.079(2) 0.101(2) 0.022(2) -0.0020(19) -0.0004(19)
 C16 0.073(2) 0.088(2) 0.0651(16) -0.0033(17) 0.0021(16) 0.012(2)
 C10 0.105(4) 0.134(5) 0.092(3) 0.011(3) 0.006(3) 0.043(4)
 C14 0.074(2) 0.110(3) 0.102(3) -0.019(3) -0.011(2) 0.012(2)
 C11 0.0766(19) 0.0660(18) 0.0609(16) -0.0058(15) -0.0039(15) 0.0180(16)
 C4 0.088(3) 0.089(3) 0.111(3) 0.013(2) -0.006(2) -0.019(2)

_geom_special_details
;
 All esds (except the esd in the dihedral angle between two l.s. planes)
 are estimated using the full covariance matrix.  The cell esds are taken
 into account individually in the estimation of esds in distances, angles
 and torsion angles; correlations between esds in cell parameters are only
 used when they are defined by crystal symmetry.  An approximate (isotropic)
 treatment of cell esds is used for estimating esds involving l.s. planes.
;
loop_
  _geom_bond_atom_site_label_1
  _geom_bond_atom_site_label_2
  _geom_bond_distance
  _geom_bond_site_symmetry_2
  _geom_bond_publ_flag
 O1 C1 1.429(5) . ?
 O1 C9 1.403(4) . ?
 O2 C9 1.431(4) . ?
 O2 C11 1.376(4) . ?
 C1 H1A 0.9700 . ?
 C1 H1B 0.9700 . ?
 C1 C2 1.497(5) . ?
 C5 H5 0.9300 . ?
 C5 C6 1.409(7) . ?
 C5 C4 1.359(6) . ?
 C7 C2 1.397(5) . ?
 C7 C6 1.395(5) . ?
 C7 C8 1.458(6) . ?
 C2 C3 1.374(6) . ?
 C13 H13 0.9300 . ?
 C13 C12 1.389(6) . ?
 C13 C14 1.362(6) . ?
 C6 H6 0.9300 . ?
 C9 H9 0.9800 . ?
 C9 C8 1.505(5) . ?
 C15 H15 0.9300 . ?
 C15 C16 1.372(5) . ?
 C15 C14 1.367(6) . ?
 C12 H12 0.9300 . ?
 C12 C11 1.382(4) . ?
 C8 C10 1.340(6) . ?
 C3 H3 0.9300 . ?
 C3 C4 1.361(6) . ?
 C16 H16 0.9300 . ?
 C16 C11 1.382(4) . ?
 C10 H10A 1.06(5) . ?
 C10 H10B 0.93(5) . ?
 C14 H14 0.9300 . ?
 C4 H4 0.9300 . ?

loop_
  _geom_angle_atom_site_label_1
  _geom_angle_atom_site_label_2
  _geom_angle_atom_site_label_3
  _geom_angle
  _geom_angle_site_symmetry_1
  _geom_angle_site_symmetry_3
  _geom_angle_publ_flag
 C9 O1 C1 112.4(2) . . ?
 C11 O2 C9 119.2(2) . . ?
 O1 C1 H1A 108.9 . . ?
 O1 C1 H1B 108.9 . . ?
 O1 C1 C2 113.6(3) . . ?
 H1A C1 H1B 107.7 . . ?
 C2 C1 H1A 108.9 . . ?
 C2 C1 H1B 108.9 . . ?
 C6 C5 H5 120.3 . . ?
 C4 C5 H5 120.3 . . ?
 C4 C5 C6 119.4(4) . . ?
 C2 C7 C8 119.2(3) . . ?
 C6 C7 C2 117.3(4) . . ?
 C6 C7 C8 123.5(4) . . ?
 C7 C2 C1 119.8(4) . . ?
 C3 C2 C1 119.1(3) . . ?
 C3 C2 C7 121.1(3) . . ?
 C12 C13 H13 119.3 . . ?
 C14 C13 H13 119.3 . . ?
 C14 C13 C12 121.5(3) . . ?
 C5 C6 H6 119.6 . . ?
 C7 C6 C5 120.8(4) . . ?
 C7 C6 H6 119.6 . . ?
 O1 C9 O2 110.8(3) . . ?
 O1 C9 H9 109.2 . . ?
 O1 C9 C8 111.8(4) . . ?
 O2 C9 H9 109.2 . . ?
 O2 C9 C8 106.6(2) . . ?
 C8 C9 H9 109.2 . . ?
 C16 C15 H15 119.7 . . ?
 C14 C15 H15 119.7 . . ?
 C14 C15 C16 120.5(4) . . ?
 C13 C12 H12 120.7 . . ?
 C11 C12 C13 118.6(4) . . ?
 C11 C12 H12 120.7 . . ?
 C7 C8 C9 115.9(3) . . ?
 C10 C8 C7 125.7(5) . . ?
 C10 C8 C9 118.4(5) . . ?
 C2 C3 H3 119.6 . . ?
 C4 C3 C2 120.7(4) . . ?
 C4 C3 H3 119.6 . . ?
 C15 C16 H16 119.9 . . ?
 C15 C16 C11 120.3(3) . . ?
 C11 C16 H16 119.9 . . ?
 C8 C10 H10A 113(3) . . ?
 C8 C10 H10B 113(3) . . ?
 H10A C10 H10B 133(4) . . ?
 C13 C14 C15 119.4(5) . . ?
 C13 C14 H14 120.3 . . ?
 C15 C14 H14 120.3 . . ?
 O2 C11 C12 125.4(3) . . ?
 O2 C11 C16 114.9(3) . . ?
 C12 C11 C16 119.7(4) . . ?
 C5 C4 C3 120.6(5) . . ?
 C5 C4 H4 119.7 . . ?
 C3 C4 H4 119.7 . . ?

loop_
  _geom_torsion_atom_site_label_1
  _geom_torsion_atom_site_label_2
  _geom_torsion_atom_site_label_3
  _geom_torsion_atom_site_label_4
  _geom_torsion
  _geom_torsion_site_symmetry_1
  _geom_torsion_site_symmetry_2
  _geom_torsion_site_symmetry_3
  _geom_torsion_site_symmetry_4
  _geom_torsion_publ_flag
 O1 C1 C2 C7 22.4(4) . . . . ?
 O1 C1 C2 C3 -159.4(3) . . . . ?
 O1 C9 C8 C7 -39.7(4) . . . . ?
 O1 C9 C8 C10 140.1(4) . . . . ?
 O2 C9 C8 C7 81.5(4) . . . . ?
 O2 C9 C8 C10 -98.7(4) . . . . ?
 C1 O1 C9 O2 -58.6(4) . . . . ?
 C1 O1 C9 C8 60.2(4) . . . . ?
 C1 C2 C3 C4 -177.1(3) . . . . ?
 C7 C2 C3 C4 1.1(5) . . . . ?
 C2 C7 C6 C5 0.4(5) . . . . ?
 C2 C7 C8 C9 11.6(4) . . . . ?
 C2 C7 C8 C10 -168.2(4) . . . . ?
 C2 C3 C4 C5 0.1(6) . . . . ?
 C13 C12 C11 O2 -177.8(3) . . . . ?
 C13 C12 C11 C16 0.1(5) . . . . ?
 C6 C5 C4 C3 -1.0(6) . . . . ?
 C6 C7 C2 C1 176.9(3) . . . . ?
 C6 C7 C2 C3 -1.3(4) . . . . ?
 C6 C7 C8 C9 -168.6(3) . . . . ?
 C6 C7 C8 C10 11.7(6) . . . . ?
 C9 O1 C1 C2 -51.5(4) . . . . ?
 C9 O2 C11 C12 4.8(5) . . . . ?
 C9 O2 C11 C16 -173.1(3) . . . . ?
 C15 C16 C11 O2 178.4(3) . . . . ?
 C15 C16 C11 C12 0.4(5) . . . . ?
 C12 C13 C14 C15 -0.6(7) . . . . ?
 C8 C7 C2 C1 -3.3(4) . . . . ?
 C8 C7 C2 C3 178.5(3) . . . . ?
 C8 C7 C6 C5 -179.4(3) . . . . ?
 C16 C15 C14 C13 1.0(7) . . . . ?
 C14 C13 C12 C11 0.0(6) . . . . ?
 C14 C15 C16 C11 -0.9(6) . . . . ?
 C11 O2 C9 O1 -71.5(4) . . . . ?
 C11 O2 C9 C8 166.6(3) . . . . ?
 C4 C5 C6 C7 0.7(6) . . . . ?

_shelx_SHELXL_version_number      '2014/7'
_olex2_submission_special_instructions 'No special instructions were received'
